# Supplementary material for: Proteomic profiling of the hypothalamus in a mouse model of cancer-induced anorexia-cachexia
Source: PubMed Central journal article supplement — Br J Cancer. 2013 Sep 3;109(7):1867–75. doi: 10.1038/bjc.2013.525 (PMC3790177; doi:10.1038/bjc.2013.525), 2013-09-03
Supplement: bjc2013525x1.pdf [file bjc2013525x1.pdf]

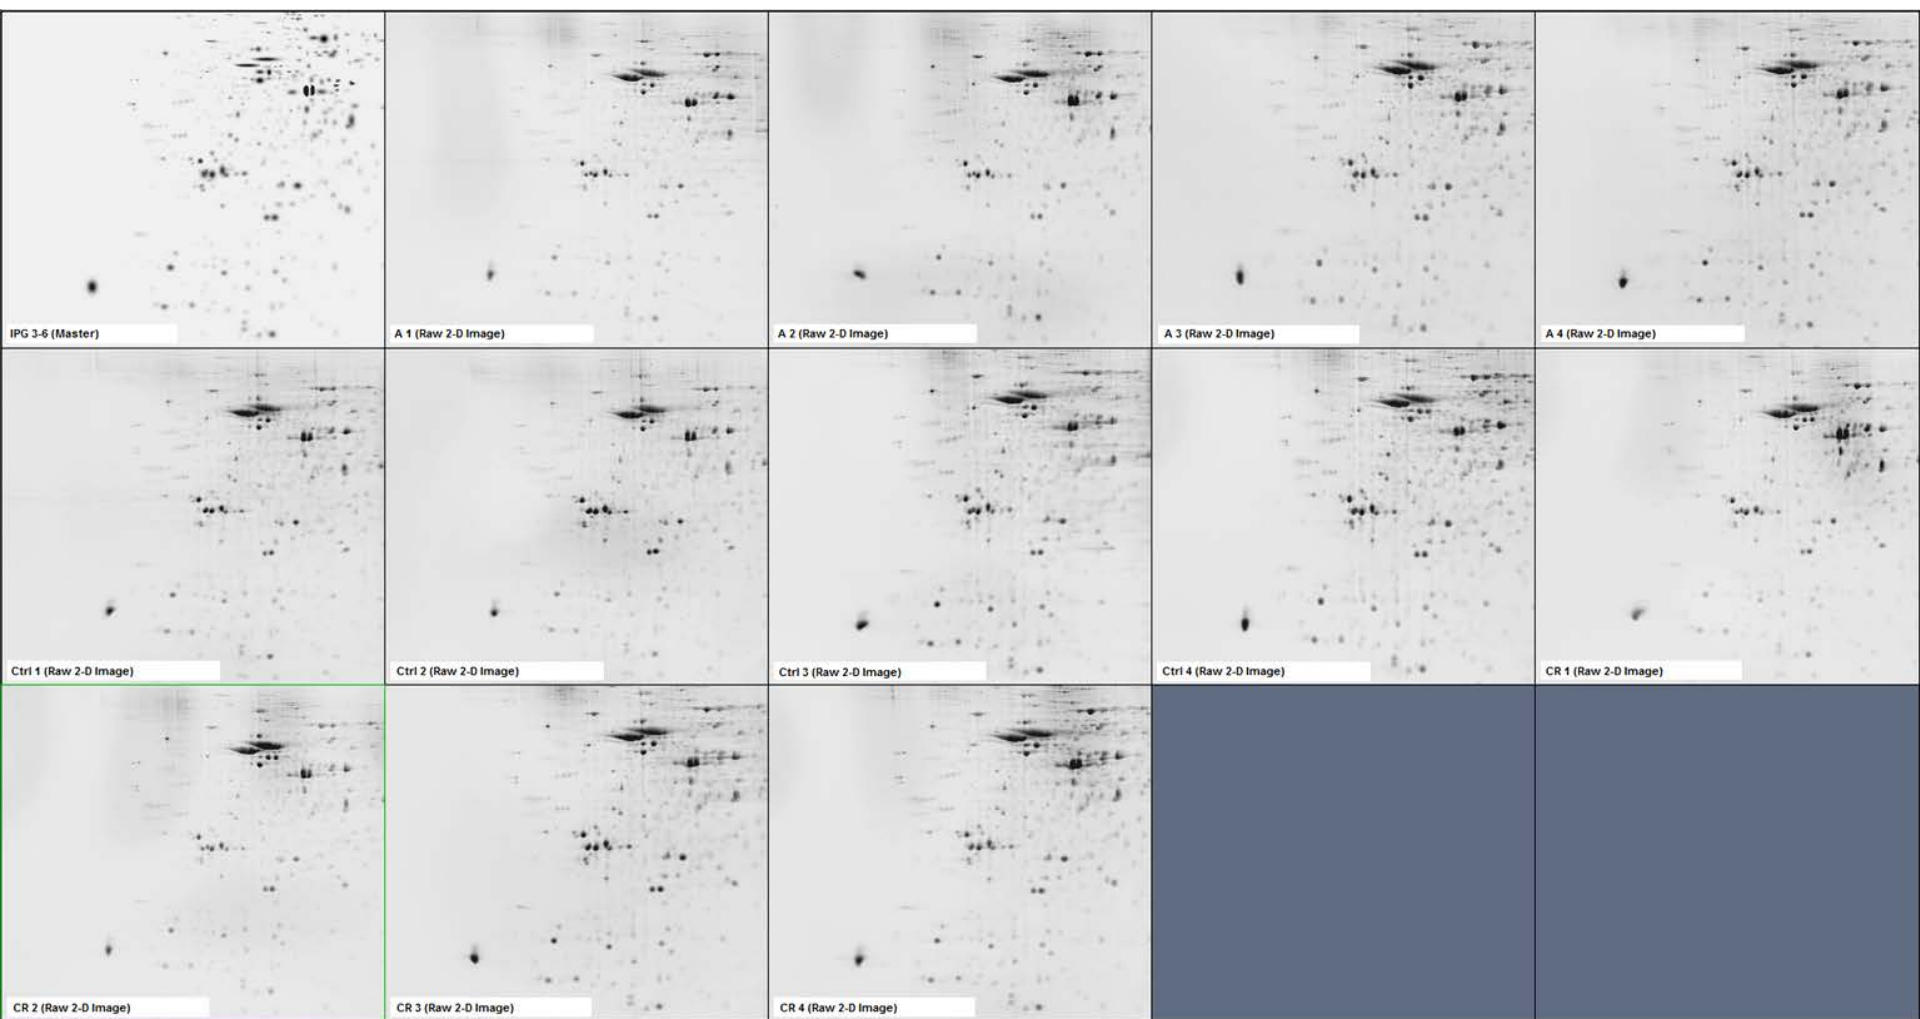

**Suppl. Figure 1** Experimental dataset of 12 gel images using IPG 3-6 strips. Each gel image is obtained from an independent animal ( $n = 4$  per group). A = anorexic tumor-bearing mice, CR = pair-fed mice, and Ctrl = control free-fed mice.

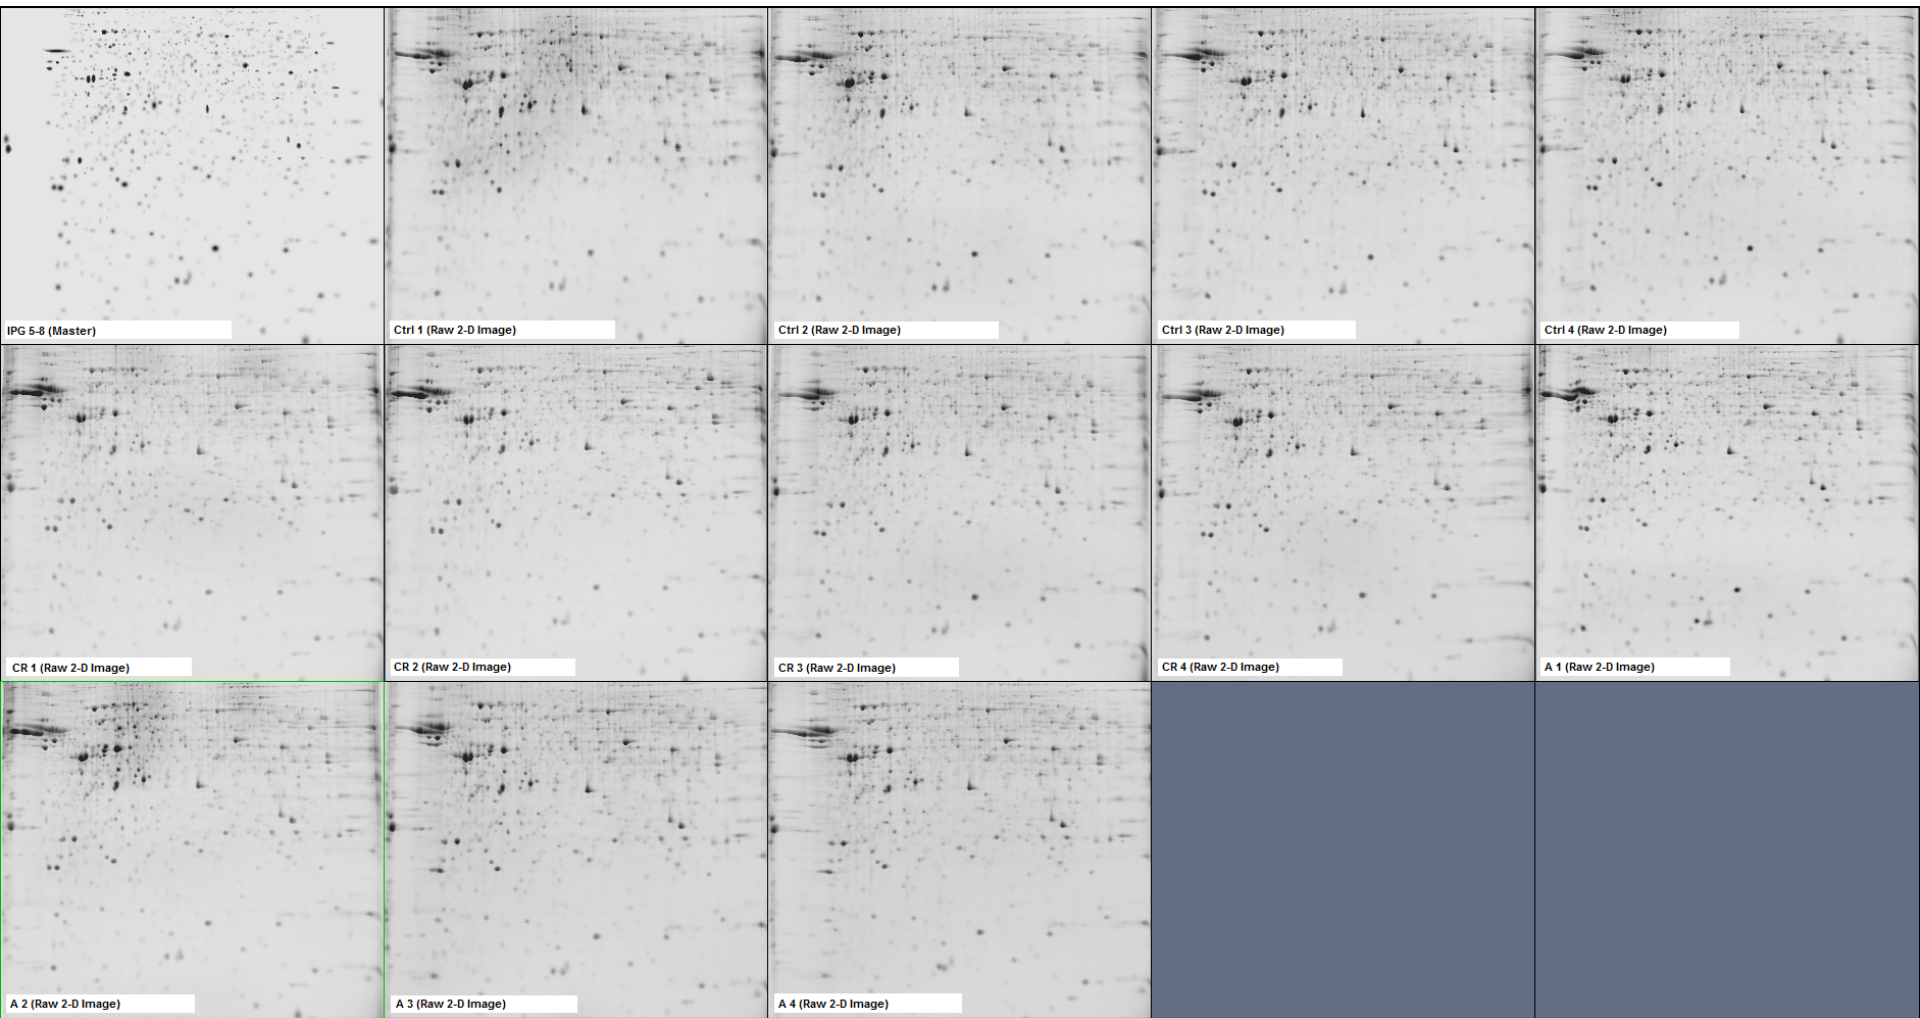

**Suppl. Figure 2** Experimental dataset of 12 gel images using IPG 5-8 strips. Each gel image is obtained from an independent animal ( $n = 4$  per group). A = anorexic tumor-bearing mice, CR = pair-fed mice, and Ctrl = control free-fed mice.

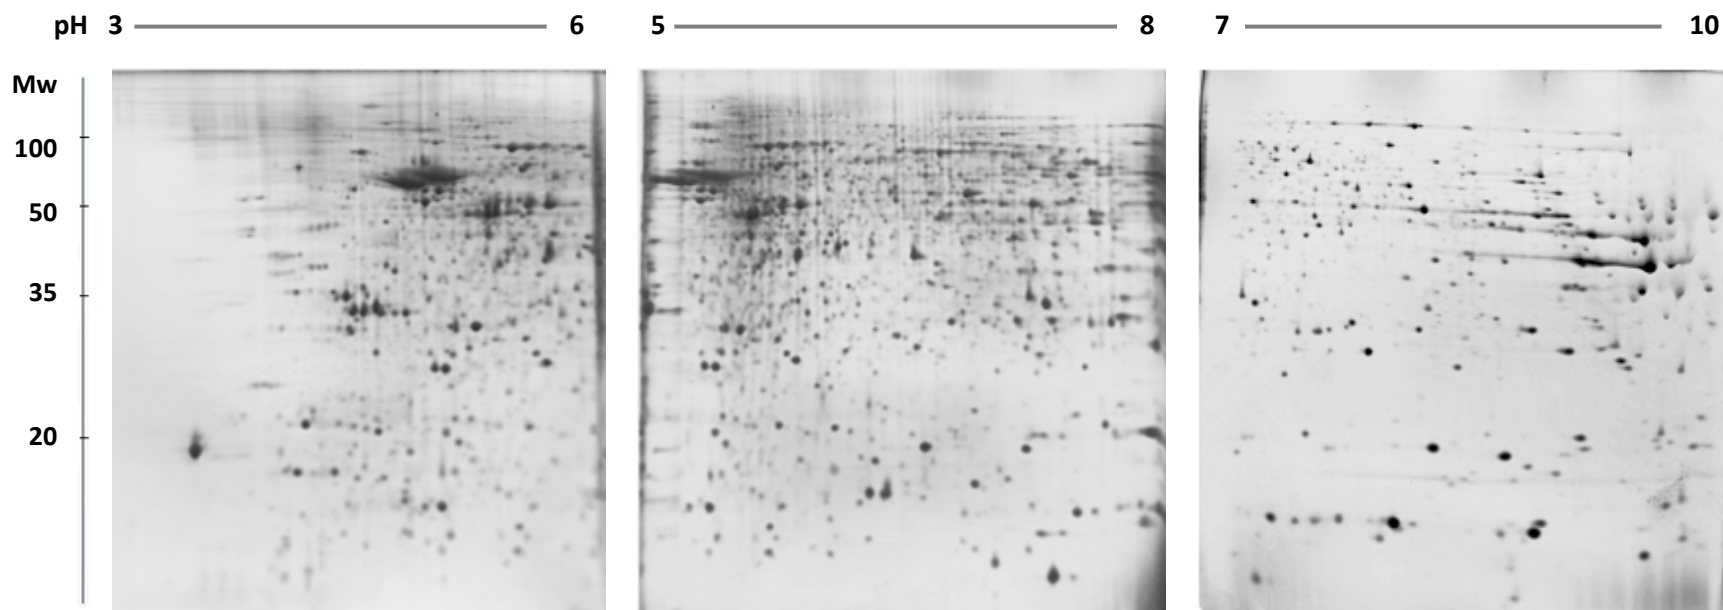

**Suppl. Figure 3** Representative gels of hypothalamic proteins (200  $\mu$ g) separated on 3 different narrow pH range IPG strips (IPG 3-6, IPG 5-8, and IPG 7-10), with overlapping areas marked at the bottom.

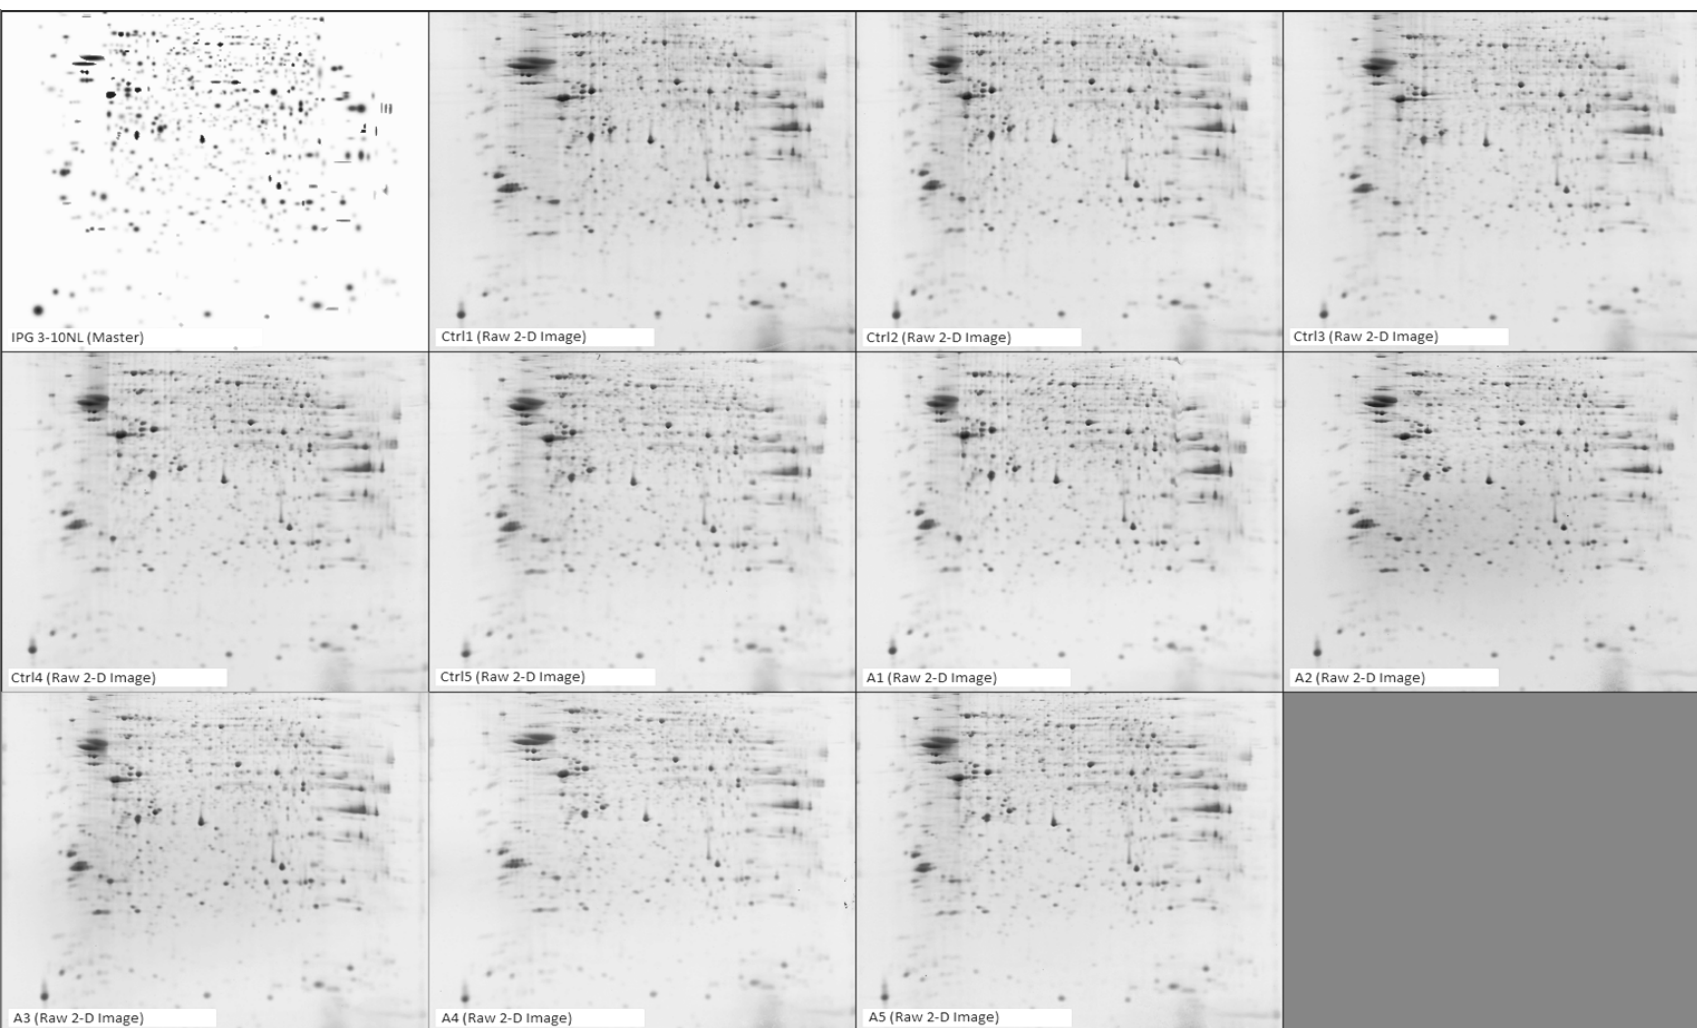

**Suppl. Figure 4** Experimental dataset of 10 gel images from the independent experiment using IPG 3-10NL strips. Each gel image is obtained from an independent animal ( $n = 5$  per group). A = anorexic tumor-bearing mice, Ctrl = control free-fed mice.
