# Supplementary material for: Proteomic profiling of the hypothalamus in a mouse model of cancer-induced anorexia-cachexia
Source: PubMed Central journal article supplement — Br J Cancer. 2013 Sep 3;109(7):1867–75. doi: 10.1038/bjc.2013.525 (PMC3790177; doi:10.1038/bjc.2013.525), 2013-09-03
Supplement: bjc2013525x3.pdf [file bjc2013525x3.pdf]

**Suppl. Table 2** Summary table from MASCOT identification for all of the identified proteins that were differentially expressed ( $P = 0.02$ ) between anorexic tumor-bearing mice, pair-fed mice and free-fed mice.

| Spot no. | Protein name                                                    | Database nr. (NCBI) | Theoretical Mr | Theoretical pI | Matches/Sequence coverage | MASCOT score MS | MASCOT score MS/MS | MASCOT peptides identified by MS/MS          |
|----------|-----------------------------------------------------------------|---------------------|----------------|----------------|---------------------------|-----------------|--------------------|----------------------------------------------|
| 1        | Heat shock protein 70 cognate                                   | NCBI/ gi 309319     | 71021          | 5,37           | 10(5)/16%                 | 367             | 55                 | VEIANDQGNR                                   |
|          |                                                                 |                     |                |                |                           |                 | 66                 | TTPSYVAFTDTER                                |
|          |                                                                 |                     |                |                |                           |                 | 65                 | NQVAMNPTNTVFDK + Oxidation (M)               |
|          |                                                                 |                     |                |                |                           |                 | 47                 | TVTNAVVTVPAYFNDSQR                           |
|          |                                                                 |                     |                |                |                           |                 | 21                 | STAGDTHLGGEDFDNR                             |
|          |                                                                 |                     |                |                |                           |                 | 14                 | STAGDTHLGGEDFDNR                             |
|          |                                                                 |                     |                |                |                           |                 | 23                 | MVNHFIAEFK + Oxidation (M)                   |
|          |                                                                 |                     |                |                |                           |                 | 18                 | MVNHFIAEFK + Oxidation (M)                   |
|          |                                                                 |                     |                |                |                           |                 | 46                 | ARFEELNADLFR                                 |
| 49       | LLQDFFNGK                                                       |                     |                |                |                           |                 |                    |                                              |
| 2        | Transaldolase                                                   | NCBI/ gi 85544436   | 37534          | 6,57           | 2(1)/4%                   | 71              | 18                 | NAIDKLFVLFGAEILK                             |
|          |                                                                 |                     |                |                |                           |                 | 53                 | LFVLFGAEILK                                  |
| 4        | Spectrin $\alpha$ 2 (Spna2), partial                            | NCBI/ gi 20380003   | 156610         | 5,29           | 5(2)/4%                   | 177             | 55                 | DLSSVQTLTK                                   |
|          |                                                                 |                     |                |                |                           |                 | 65                 | QETFDAGLQAFQQEGIANITALK                      |
|          |                                                                 |                     |                |                |                           |                 | 33                 | SSLSSAQADFNQLAELDR                           |
|          |                                                                 |                     |                |                |                           |                 | 31                 | SSEEIESAFR                                   |
|          |                                                                 |                     |                |                |                           |                 | 28                 | SSEEIESAFR                                   |
| 5        | Guanine nucleotide-binding protein G(0) subunit alpha isoform A | NCBI/ gi 6754012    | 40629          | 5,34           | 11(3)/35%                 | 356             | 37                 | LFDVGGQR                                     |
|          |                                                                 |                     |                |                |                           |                 | 53                 | YYLDSLDR                                     |
|          |                                                                 |                     |                |                |                           |                 | 79                 | LLLLGAGESGK                                  |
|          |                                                                 |                     |                |                |                           |                 | 44                 | TTGIVETHFTFK                                 |
|          |                                                                 |                     |                |                |                           |                 | 14                 | IHEDGFSGEDVK                                 |
|          |                                                                 |                     |                |                |                           |                 | 21                 | AMD <sup>U</sup> TLGVEYGDKER + Oxidation (M) |
|          |                                                                 |                     |                |                |                           |                 | 30                 | IGAGDYQPTAQDILR                              |
|          |                                                                 |                     |                |                |                           |                 | (19)               | MEDTEPFSAELLSAMMR + 3 Oxidation (M)          |
|          |                                                                 |                     |                |                |                           |                 | 31                 | MEDTEPFSAELLSAMMR + 3 Oxidation (M)          |
| 47       | QYKPVVYSNTIQSLAAIVR                                             |                     |                |                |                           |                 |                    |                                              |
| 6        | Selenium-binding protein 1                                      | NCBI/ gi 22164798   | 53051          | 5,87           | 7(3)/15%                  | 269             | 67                 | NTGTEAPDYLATVDVDPK                           |
|          |                                                                 |                     |                |                |                           |                 | 25                 | LILPGLISSR                                   |
|          |                                                                 |                     |                |                |                           |                 | 74                 | IYVVDVGSEPR                                  |
|          |                                                                 |                     |                |                |                           |                 | 10                 | IYVVDVGSEPR                                  |



16 VASSVPVENFTIHGGLSR  
 14 QILLPFR  
 19 KPLIVFTPK  
 25 TSFDEMLPGTHFQR + Oxidation (M)  
 27 TSFDEMLPGTHFQR + Oxidation (M)  
 1 VYYDLTR  
 48 NMEEEEVAITR + Oxidation (M)  
 46 IEQLSPFPFDLLLK  
 25 IEQLSPFPFDLLLK

---

|    |             |                   |       |      |                |      |    |                                               |
|----|-------------|-------------------|-------|------|----------------|------|----|-----------------------------------------------|
| 11 | Dynamamin-1 | NCBI/ gi 32172431 | 98140 | 7,61 | 24(16)/<br>27% | 1107 | 65 | SSVLENFVGR                                    |
|    |             |                   |       |      |                |      | 35 | FTDFEEVR                                      |
|    |             |                   |       |      |                |      | 76 | FTDFEEVRLEIEAETDR                             |
|    |             |                   |       |      |                |      | 45 | LEIEAETDR                                     |
|    |             |                   |       |      |                |      | 46 | GISVPINLR                                     |
|    |             |                   |       |      |                |      | 44 | VYSPHVLNLTLDLPG <u>M</u> TK + Oxidation (M)   |
|    |             |                   |       |      |                |      | 50 | VPVGDQPPDIEFQIR                               |
|    |             |                   |       |      |                |      | 90 | VPVGDQPPDIEFQIR                               |
|    |             |                   |       |      |                |      | 14 | D <u>M</u> L <u>M</u> QFVTK + 2 Oxidation (M) |
|    |             |                   |       |      |                |      | 8  | ENCLILAVSPANSDLANSALK                         |
|    |             |                   |       |      |                |      | 80 | LDL <u>M</u> DEGTDAR + Oxidation (M)          |
|    |             |                   |       |      |                |      | 22 | LDL <u>M</u> DEGTDARDVLENK + Oxidation (M)    |
|    |             |                   |       |      |                |      | 37 | GYIGVVNR                                      |
|    |             |                   |       |      |                |      | 64 | DITAALAAER                                    |
|    |             |                   |       |      |                |      | 41 | LQSLLSIEK                                     |
|    |             |                   |       |      |                |      | 73 | ALLQ <u>M</u> VQQFAVDFEK + Oxidation (M)      |
|    |             |                   |       |      |                |      | 66 | ALLQ <u>M</u> VQQFAVDFEK + Oxidation (M)      |
|    |             |                   |       |      |                |      | 46 | RIEGSGDQIDTYELSGGAR                           |
|    |             |                   |       |      |                |      | 55 | IEGSGDQIDTYELSGGAR                            |
|    |             |                   |       |      |                |      | 28 | FPFELVK                                       |
|    |             |                   |       |      |                |      | 55 | TGLFTP <u>D</u> MAFETIVK + Oxidation (M)      |
|    |             |                   |       |      |                |      | 76 | TSGNQDEILVIR                                  |
|    |             |                   |       |      |                |      | 47 | Y <u>M</u> LSVDNLK + Oxidation (M)            |
|    |             |                   |       |      |                |      | 73 | NLVDSY <u>M</u> AIVNK + Oxidation (M)         |

---

|    |                                              |                   |       |      |              |     |     |                                                                    |
|----|----------------------------------------------|-------------------|-------|------|--------------|-----|-----|--------------------------------------------------------------------|
| 12 | Atp5b protein<br>(ATP synthase beta-subunit) | NCBI/ gi 23272966 | 56632 | 5,24 | 7(5)/<br>21% | 473 | 62  | IGLFGGAGVGK                                                        |
|    |                                              |                   |       |      |              |     | 71  | TVL <u>M</u> ELINNVAK + Oxidation (M)                              |
|    |                                              |                   |       |      |              |     | 12  | VALVYGQ <u>M</u> NEPPGAR + Oxidation (M)                           |
|    |                                              |                   |       |      |              |     | 115 | FTQAGSEVSALLGR                                                     |
|    |                                              |                   |       |      |              |     | 59  | IPSAVGYQPTLATD <u>M</u> G <u>T</u> M <u>Q</u> ER + 2 Oxidation (M) |
|    |                                              |                   |       |      |              |     | 38  | I <u>M</u> DPNIVGNEHYDVAR + Oxidation (M)                          |
|    |                                              |                   |       |      |              |     | 118 | SLQDIHAILG <u>M</u> DELSEEDKLTVSR + Oxidation (M)                  |

|    |                                          |                   |       |      |                |      |     |                                                                 |
|----|------------------------------------------|-------------------|-------|------|----------------|------|-----|-----------------------------------------------------------------|
| 13 | Dihydropyrimidinase-related protein 2    | NCBI/ gi 40254595 | 62638 | 5,95 | 22(14)/<br>49% | 1189 | 123 | IVNDDQSFYADIY <u>M</u> EDGLIK + Oxidation (M)                   |
|    |                                          |                   |       |      |                |      | 71  | IVNDDQSFYADIY <u>M</u> EDGLIK + Oxidation (M)                   |
|    |                                          |                   |       |      |                |      | 21  | QIGENLIVPGGVK                                                   |
|    |                                          |                   |       |      |                |      | 38  | FQ <u>M</u> PDQ <u>G</u> M <u>T</u> SADDFQGTK + 2 Oxidation (M) |
|    |                                          |                   |       |      |                |      | 64  | FQ <u>M</u> PDQ <u>G</u> M <u>T</u> SADDFQGTK + 2 Oxidation (M) |
|    |                                          |                   |       |      |                |      | 74  | AALAGGTT <u>M</u> IIDHVPEPGTSLAAFDQWR + Oxidation (M)           |
|    |                                          |                   |       |      |                |      | 38  | GIQE <u>E</u> MEALVK + Oxidation (M)                            |
|    |                                          |                   |       |      |                |      | 77  | DRFQLTDSQIYEVLVIR                                               |
|    |                                          |                   |       |      |                |      | 121 | FQLTDSQIYEVLVIR                                                 |
|    |                                          |                   |       |      |                |      | 82  | DIGAIQVHAENGDIIEEQQR                                            |
|    |                                          |                   |       |      |                |      | 55  | ILDLGITGPEGHVLSRPEEVEAEAVNR                                     |
|    |                                          |                   |       |      |                |      | 69  | SITIANQTNCPYVTK                                                 |
|    |                                          |                   |       |      |                |      | 83  | SAAEVIAQAR                                                      |
|    |                                          |                   |       |      |                |      | 125 | <u>M</u> DENQFVAVTSTNAAK + Oxidation (M)                        |
|    |                                          |                   |       |      |                |      | 66  | <u>M</u> DENQFVAVTSTNAAK + Oxidation (M)                        |
|    |                                          |                   |       |      |                |      | 44  | VFNLVPR                                                         |
|    |                                          |                   |       |      |                |      | 57  | ISVGSADLVIWDPDSVK                                               |
|    |                                          |                   |       |      |                |      | 72  | GSPLVVISQGK                                                     |
|    |                                          |                   |       |      |                |      | 41  | IVLEDGTLHVTEGSGR                                                |
| 35 | IVLEDGTLHVTEGSGR                         |                   |       |      |                |      |     |                                                                 |
| 19 | KFPDFVYK                                 |                   |       |      |                |      |     |                                                                 |
| 26 | NLHQSGFSLGAQIDDNIPR                      |                   |       |      |                |      |     |                                                                 |
| 14 | N-Ethylmaleimide-Sensitive Factor (SKD2) | NCBI/ gi 557878   | 83131 | 6,52 | 53(25)/<br>59% | 2366 | 32  | DFQSGQH <u>V</u> MVR + Oxidation (M)                            |
|    |                                          |                   |       |      |                |      | 18  | DFQSGQH <u>V</u> MVR + Oxidation (M)                            |
|    |                                          |                   |       |      |                |      | 23  | YIFTLR                                                          |
|    |                                          |                   |       |      |                |      | 75  | WAGLSIGQDIEVALYSFDK                                             |
|    |                                          |                   |       |      |                |      | 39  | WAGLSIGQDIEVALYSFDK                                             |
|    |                                          |                   |       |      |                |      | 72  | QCIGT <u>M</u> TIEIDFLQK + Oxidation (M)                        |
|    |                                          |                   |       |      |                |      | 24  | NIDSNPYDTDK                                                     |
|    |                                          |                   |       |      |                |      | 30  | LFGLLVK                                                         |
|    |                                          |                   |       |      |                |      | 36  | LFGLLVK                                                         |
|    |                                          |                   |       |      |                |      | 58  | DIEA <u>M</u> DPSILK + Oxidation (M)                            |
|    |                                          |                   |       |      |                |      | 80  | QKIEVGLVVGNSQVAFEK                                              |
|    |                                          |                   |       |      |                |      | 26  | QKIEVGLVVGNSQVAFEK                                              |
|    |                                          |                   |       |      |                |      | 120 | IEVGLVVGNSQVAFEK                                                |
|    |                                          |                   |       |      |                |      | 63  | AENSSLNLIGK                                                     |
|    |                                          |                   |       |      |                |      | 27  | QSIINPDWNFEK                                                    |
| 41 | <u>M</u> GIGGLDK + Oxidation (M)         |                   |       |      |                |      |     |                                                                 |
| 64 | <u>M</u> GIGGLDKEFSDFR + Oxidation (M)   |                   |       |      |                |      |     |                                                                 |
| 69 | <u>M</u> GIGGLDKEFSDFR + Oxidation (M)   |                   |       |      |                |      |     |                                                                 |

32 VFPPEIVEQMGCK + Oxidation (M)  
45 VFPPEIVEQMGCK + Oxidation (M)  
30 GILLYGPPGCGK  
55 VVNGPEILNK  
61 YVGESEANIR  
95 KLFADAE<sup>4</sup>EEQR  
70 LFADAE<sup>4</sup>EEQR  
23 LFADAE<sup>4</sup>EEQRR  
75 LGANSGLHIIIFDEIDAICK  
57 GSMAGSTGVHDTVVNQLLSK + Oxidation (M)  
51 MEIGLPDEK + Oxidation (M)  
39 MEIGLPDEKGR + Oxidation (M)  
33 LQILHIHTAR  
87 GHQLLSADVDIK  
73 NFGAELEGLVR  
26 VEVDMEKAESLQVTR + Oxidation (M)  
32 AESLQVTR  
24 WGD<sup>4</sup>PVTR  
84 VLDDGELLVQQTK  
81 TPLVSVLLEGPPHSGK  
41 IAESNFPFIK  
31 MIGFSETAK + Oxidation (M)  
35 KIFDDAYK  
101 SQLSCVVDDIER  
52 LLDYVPIGPR  
112 FSNLVLQALLVLLK  
27 FSNLVLQALLVLLKK  
45 KLLIIGTTSR  
39 LLIIGTTSR  
25 TTIAQQVK  
60 LLMLIEMSLQMDPEYR + 3 Oxidation (M)  
66 LLMLIEMSLQMDPEYR + 3 Oxidation (M)  
20 FLALMR + Oxidation (M)  
4 FLALMREEGASPLDFD + Oxidation (M)  
36 EEGASPLDFD

---
